# Supplementary material
Source: publisher figshare collection journal article supplement (https://acs.figshare.com/ndownloader/files/3936721)
Supplement: Supplementary file 1 [file 3936721]

 
data_1 
 
_audit_creation_method            SHELXL-97 
_chemical_name_systematic 
; 
 ? 
; 
_chemical_name_common             ? 
_chemical_melting_point           'not measured' 
_chemical_formula_moiety          'C32 H41 Eu2 N7 O18' 
_chemical_formula_sum 
 'C32 H41 Eu2 N7 O18' 
_chemical_formula_weight          1115.64 
 
loop_ 
 _atom_type_symbol 
 _atom_type_description 
 _atom_type_scat_dispersion_real 
 _atom_type_scat_dispersion_imag 
 _atom_type_scat_source 
 'C'  'C'   0.0033   0.0016 
 'International Tables Vol C Tables 4.2.6.8 and 6.1.1.4' 
 'H'  'H'   0.0000   0.0000 
 'International Tables Vol C Tables 4.2.6.8 and 6.1.1.4' 
 'N'  'N'   0.0061   0.0033 
 'International Tables Vol C Tables 4.2.6.8 and 6.1.1.4' 
 'O'  'O'   0.0106   0.0060 
 'International Tables Vol C Tables 4.2.6.8 and 6.1.1.4' 
 'Eu'  'Eu'  -0.1578   3.6682 
 'International Tables Vol C Tables 4.2.6.8 and 6.1.1.4' 
 
_symmetry_cell_setting            monoclinic
_symmetry_space_group_name_H-M    c2/c 
 
loop_ 
 _symmetry_equiv_pos_as_xyz 
 'x, y, z' 
 '-x, y, -z+1/2' 
 'x+1/2, y+1/2, z' 
 '-x+1/2, y+1/2, -z+1/2' 
 '-x, -y, -z' 
 'x, -y, z-1/2' 
 '-x+1/2, -y+1/2, -z' 
 'x+1/2, -y+1/2, z-1/2' 
 
_cell_length_a                    22.348(5) 
_cell_length_b                    13.357(3) 
_cell_length_c                    15.002(3) 
_cell_angle_alpha                 90.00 
_cell_angle_beta                  97.35(3) 
_cell_angle_gamma                 90.00 
_cell_volume                      4441.4(15) 
_cell_formula_units_Z             4 
_cell_measurement_temperature     293(2) 
_cell_measurement_reflns_used     ? 
_cell_measurement_theta_min       ? 
_cell_measurement_theta_max       ? 
 
_exptl_crystal_description        block
_exptl_crystal_colour             colourless 
_exptl_crystal_size_max           0.23 
_exptl_crystal_size_mid           0.21 
_exptl_crystal_size_min           0.19 
_exptl_crystal_density_meas       none 
_exptl_crystal_density_diffrn     1.668 
_exptl_crystal_density_method     'not measured' 
_exptl_crystal_F_000              2208 
_exptl_absorpt_coefficient_mu     2.874 
_exptl_absorpt_correction_type    empirical 
_exptl_absorpt_correction_T_min   0.4318
_exptl_absorpt_correction_T_max   0.4902  
_exptl_absorpt_process_details    SADABS 
 
_exptl_special_details 
; 
 ? 
; 
 
_diffrn_ambient_temperature       293(2) 
_diffrn_radiation_wavelength      0.71073 
_diffrn_radiation_type            MoK\a 
_diffrn_radiation_source          'fine-focus sealed tube' 
_diffrn_radiation_monochromator   graphite 
_diffrn_measurement_device_type   'CCD area detector'
_diffrn_measurement_method        'phi and omega scans'
_diffrn_detector_area_resol_mean  '9.00cm'
_diffrn_standards_number          none 
_diffrn_standards_interval_count  none 
_diffrn_standards_interval_time   none 
_diffrn_standards_decay_%         none
_diffrn_reflns_number             15888 
_diffrn_reflns_av_R_equivalents   0.0564 
_diffrn_reflns_av_sigmaI/netI     0.0691 
_diffrn_reflns_limit_h_min        -29 
_diffrn_reflns_limit_h_max        13 
_diffrn_reflns_limit_k_min        -17 
_diffrn_reflns_limit_k_max        17 
_diffrn_reflns_limit_l_min        -20 
_diffrn_reflns_limit_l_max        19 
_diffrn_reflns_theta_min          1.84 
_diffrn_reflns_theta_max          28.37 
_reflns_number_total              5488 
_reflns_number_gt                 4111 
_reflns_threshold_expression      >2sigma(I) 
 
_computing_data_collection        'Bruker SMART' 
_computing_cell_refinement        'Bruker SMART' 
_computing_data_reduction         'Bruker SAINT' 
_computing_structure_solution     'SHELXS-97 (Sheldrick, 1990)' 
_computing_structure_refinement   'SHELXL-97 (Sheldrick, 1997)' 
_computing_molecular_graphics     'SHELXP-97' 
_computing_publication_material   'SHELXTL' 
 
_refine_special_details 
; 
 Refinement of F^2^ against ALL reflections.  The weighted R-factor wR and 
 goodness of fit S are based on F^2^, conventional R-factors R are based 
 on F, with F set to zero for negative F^2^. The threshold expression of 
 F^2^ > 2sigma(F^2^) is used only for calculating R-factors(gt) etc. and is 
 not relevant to the choice of reflections for refinement.  R-factors based 
 on F^2^ are statistically about twice as large as those based on F, and R- 
 factors based on ALL data will be even larger. 
; 
 
_refine_ls_structure_factor_coef  Fsqd  
_refine_ls_matrix_type            full 
_refine_ls_weighting_scheme       calc  
_refine_ls_weighting_details 
 'calc w=1/[\s^2^(Fo^2^)+(0.0845P)^2^+0.0000P] where P=(Fo^2^+2Fc^2^)/3' 
_atom_sites_solution_primary      direct 
_atom_sites_solution_secondary    difmap 
_atom_sites_solution_hydrogens    geom 
_refine_ls_hydrogen_treatment     constr 
_refine_ls_extinction_method      none 
_refine_ls_extinction_coef        ? 
_refine_ls_number_reflns          5488 
_refine_ls_number_parameters      205 
_refine_ls_number_restraints      64 
_refine_ls_R_factor_all           0.0673 
_refine_ls_R_factor_gt            0.0506 
_refine_ls_wR_factor_ref          0.1489 
_refine_ls_wR_factor_gt           0.1402 
_refine_ls_goodness_of_fit_ref    1.066 
_refine_ls_restrained_S_all       1.063 
_refine_ls_shift/su_max           0.001 
_refine_ls_shift/su_mean          0.000 
 
loop_ 
 _atom_site_label 
 _atom_site_type_symbol 
 _atom_site_fract_x 
 _atom_site_fract_y 
 _atom_site_fract_z 
 _atom_site_U_iso_or_equiv 
 _atom_site_adp_type 
 _atom_site_occupancy 
 _atom_site_symmetry_multiplicity 
 _atom_site_calc_flag 
 _atom_site_refinement_flags 
 _atom_site_disorder_assembly 
 _atom_site_disorder_group 
Eu1 Eu 0.330597(12) 0.32038(2) 0.527188(17) 0.02092(12) Uani 1 1 d . . . 
O1 O 0.2136(2) 0.3310(3) 0.4346(3) 0.0344(11) Uani 1 1 d . . . 
O2 O 0.2866(2) 0.4322(4) 0.4086(3) 0.0387(11) Uani 1 1 d . . . 
O3 O 0.2593(2) 0.6237(4) 0.1214(3) 0.0375(11) Uani 1 1 d . . . 
O4 O 0.1761(2) 0.7175(4) 0.1032(3) 0.0344(10) Uani 1 1 d . . . 
C1 C 0.0919(3) 0.5099(5) 0.2581(4) 0.0298(13) Uani 1 1 d . . . 
C2 C 0.1287(3) 0.4519(5) 0.3199(4) 0.0342(14) Uani 1 1 d . . . 
H2 H 0.1116 0.4088 0.3583 0.100 Uiso 1 1 calc . . . 
C3 C 0.1914(3) 0.4588(4) 0.3240(4) 0.0252(12) Uani 1 1 d . . . 
C4 C 0.2164(3) 0.5203(5) 0.2635(4) 0.0280(13) Uani 1 1 d . . . 
H4 H 0.2581 0.5228 0.2645 0.100 Uiso 1 1 calc . . . 
C5 C 0.1797(3) 0.5779(5) 0.2018(4) 0.0268(13) Uani 1 1 d . . . 
C6 C 0.1174(3) 0.5750(5) 0.2006(4) 0.0294(13) Uani 1 1 d . . . 
H6 H 0.0928 0.6163 0.1617 0.100 Uiso 1 1 calc . . . 
C7 C 0.0271(3) 0.5063(5) 0.2528(4) 0.0332(14) Uani 1 1 d . . . 
C8 C 0.2336(3) 0.4039(5) 0.3936(4) 0.0292(13) Uani 1 1 d . . . 
C9 C 0.2078(3) 0.6452(5) 0.1376(4) 0.0291(13) Uani 1 1 d . . . 
O5 O 0.3615(4) 0.4861(7) 0.5761(6) 0.1041(16) Uani 1 1 d U . . 
N1 N 0.3308(5) 0.6413(9) 0.6354(7) 0.1041(16) Uani 1 1 d DU . . 
C10 C 0.3238(7) 0.5547(11) 0.5865(9) 0.1041(16) Uani 1 1 d U . . 
H10 H 0.2853 0.5445 0.5562 0.100 Uiso 1 1 calc . . . 
C11 C 0.2862(6) 0.7171(11) 0.6451(9) 0.1041(16) Uani 1 1 d DU . . 
H11A H 0.3019 0.7634 0.6912 0.100 Uiso 1 1 calc . . . 
H11B H 0.2504 0.6862 0.6614 0.100 Uiso 1 1 calc . . . 
H11C H 0.2767 0.7522 0.5893 0.100 Uiso 1 1 calc . . . 
C12 C 0.3911(6) 0.6398(11) 0.6794(9) 0.1041(16) Uani 1 1 d DU . . 
H12A H 0.3980 0.6976 0.7173 0.100 Uiso 1 1 calc . . . 
H12B H 0.4187 0.6404 0.6353 0.100 Uiso 1 1 calc . . . 
H12C H 0.3974 0.5803 0.7153 0.100 Uiso 1 1 calc . . . 
O6 O 0.3822(4) 0.3028(5) 0.6762(5) 0.0780(12) Uani 1 1 d U . . 
N2 N 0.4105(5) 0.3357(6) 0.8247(6) 0.0780(12) Uani 1 1 d DU . . 
C13 C 0.3789(6) 0.3442(9) 0.7485(8) 0.0780(12) Uani 1 1 d U . . 
H13 H 0.3475 0.3901 0.7472 0.100 Uiso 1 1 calc . . . 
C14 C 0.4509(5) 0.2497(8) 0.8327(7) 0.0780(12) Uani 1 1 d DU . . 
H14A H 0.4683 0.2421 0.8942 0.100 Uiso 1 1 calc . . . 
H14B H 0.4824 0.2599 0.7957 0.100 Uiso 1 1 calc . . . 
H14C H 0.4285 0.1905 0.8134 0.100 Uiso 1 1 calc . . . 
C15 C 0.3995(5) 0.3846(9) 0.9038(7) 0.0780(12) Uani 1 1 d DU . . 
H15A H 0.4273 0.3609 0.9533 0.100 Uiso 1 1 calc . . . 
H15B H 0.3590 0.3710 0.9151 0.100 Uiso 1 1 calc . . . 
H15C H 0.4046 0.4555 0.8970 0.100 Uiso 1 1 calc . . . 
N3 N 0.4482(3) 0.2769(6) 0.4699(5) 0.0512(17) Uani 1 1 d . . . 
O7 O 0.4214(3) 0.3599(5) 0.4534(5) 0.0699(19) Uani 1 1 d . . . 
O8 O 0.4264(3) 0.2205(5) 0.5232(4) 0.0600(16) Uani 1 1 d . . . 
O9 O 0.4906(3) 0.2503(7) 0.4320(5) 0.097(3) Uani 1 1 d . . . 
 
loop_ 
 _atom_site_aniso_label 
 _atom_site_aniso_U_11 
 _atom_site_aniso_U_22 
 _atom_site_aniso_U_33 
 _atom_site_aniso_U_23 
 _atom_site_aniso_U_13 
 _atom_site_aniso_U_12 
Eu1 0.01946(17) 0.02385(17) 0.01899(17) -0.00115(11) 0.00071(11) 0.00003(11) 
O1 0.044(3) 0.030(2) 0.029(2) 0.0079(18) 0.005(2) 0.000(2) 
O2 0.027(2) 0.040(3) 0.046(3) 0.013(2) -0.007(2) 0.001(2) 
O3 0.025(2) 0.049(3) 0.039(2) 0.017(2) 0.006(2) 0.000(2) 
O4 0.035(3) 0.037(2) 0.031(2) 0.013(2) 0.006(2) 0.005(2) 
C1 0.020(3) 0.034(3) 0.035(3) 0.006(3) 0.004(2) -0.002(2) 
C2 0.029(3) 0.035(3) 0.042(4) 0.010(3) 0.016(3) 0.004(3) 
C3 0.021(3) 0.025(3) 0.029(3) 0.004(2) 0.003(2) 0.003(2) 
C4 0.020(3) 0.034(3) 0.030(3) 0.004(2) 0.002(2) 0.001(2) 
C5 0.020(3) 0.039(3) 0.022(3) 0.012(2) 0.005(2) 0.000(2) 
C6 0.024(3) 0.037(3) 0.027(3) 0.009(3) 0.003(2) 0.000(3) 
C7 0.029(3) 0.037(3) 0.035(3) 0.004(3) 0.007(3) 0.001(3) 
C8 0.034(3) 0.029(3) 0.024(3) 0.006(2) 0.003(2) 0.009(3) 
C9 0.023(3) 0.035(3) 0.029(3) 0.006(3) 0.001(2) -0.003(3) 
O5 0.1045(17) 0.1039(17) 0.1040(16) -0.0002(4) 0.0133(5) -0.0003(4) 
N1 0.1045(17) 0.1039(17) 0.1040(16) -0.0002(4) 0.0133(5) -0.0003(4) 
C10 0.1045(17) 0.1039(17) 0.1040(16) -0.0002(4) 0.0133(5) -0.0003(4) 
C11 0.1045(17) 0.1039(17) 0.1040(16) -0.0002(4) 0.0133(5) -0.0003(4) 
C12 0.1045(17) 0.1039(17) 0.1040(16) -0.0002(4) 0.0133(5) -0.0003(4) 
O6 0.0783(12) 0.0782(12) 0.0772(12) -0.0007(4) 0.0090(5) 0.0013(4) 
N2 0.0783(12) 0.0782(12) 0.0772(12) -0.0007(4) 0.0090(5) 0.0013(4) 
C13 0.0783(12) 0.0782(12) 0.0772(12) -0.0007(4) 0.0090(5) 0.0013(4) 
C14 0.0783(12) 0.0782(12) 0.0772(12) -0.0007(4) 0.0090(5) 0.0013(4) 
C15 0.0783(12) 0.0782(12) 0.0772(12) -0.0007(4) 0.0090(5) 0.0013(4) 
N3 0.026(3) 0.070(5) 0.059(4) -0.008(4) 0.011(3) -0.002(3) 
O7 0.055(4) 0.054(4) 0.107(5) -0.005(4) 0.034(4) -0.016(3) 
O8 0.038(3) 0.086(4) 0.055(3) 0.009(3) 0.006(3) 0.030(3) 
O9 0.056(4) 0.142(8) 0.102(6) -0.023(5) 0.048(4) 0.008(5) 
 
_geom_special_details 
; 
 All esds (except the esd in the dihedral angle between two l.s. planes) 
 are estimated using the full covariance matrix.  The cell esds are taken 
 into account individually in the estimation of esds in distances, angles 
 and torsion angles; correlations between esds in cell parameters are only 
 used when they are defined by crystal symmetry.  An approximate (isotropic) 
 treatment of cell esds is used for estimating esds involving l.s. planes. 
; 
 
loop_ 
 _geom_bond_atom_site_label_1 
 _geom_bond_atom_site_label_2 
 _geom_bond_distance 
 _geom_bond_site_symmetry_2 
 _geom_bond_publ_flag 
Eu1 O1 2.353(4) 7_556 ? 
Eu1 O4 2.379(4) 4_545 ? 
Eu1 O3 2.380(4) 6_566 ? 
Eu1 O6 2.392(8) . ? 
Eu1 O5 2.405(9) . ? 
Eu1 O2 2.433(4) . ? 
Eu1 O7 2.489(6) . ? 
Eu1 O8 2.530(5) . ? 
Eu1 O1 2.804(5) . ? 
Eu1 N3 2.926(6) . ? 
Eu1 C8 2.974(6) . ? 
Eu1 C10 3.263(15) . ? 
O1 C8 1.263(7) . ? 
O1 Eu1 2.353(4) 7_556 ? 
O2 C8 1.235(8) . ? 
O3 C9 1.240(8) . ? 
O3 Eu1 2.380(4) 6_565 ? 
O4 C9 1.270(8) . ? 
O4 Eu1 2.379(4) 4 ? 
C1 C2 1.393(9) . ? 
C1 C6 1.396(8) . ? 
C1 C7 1.442(9) . ? 
C2 C3 1.397(8) . ? 
C2 H2 0.9300 . ? 
C3 C4 1.394(8) . ? 
C3 C8 1.506(8) . ? 
C4 C5 1.387(8) . ? 
C4 H4 0.9300 . ? 
C5 C6 1.393(8) . ? 
C5 C9 1.511(8) . ? 
C6 H6 0.9300 . ? 
C7 C7 1.201(13) 2 ? 
O5 C10 1.269(16) . ? 
N1 C10 1.367(16) . ? 
N1 C12 1.423(13) . ? 
N1 C11 1.441(14) . ? 
C10 H10 0.9300 . ? 
C11 H11A 0.9600 . ? 
C11 H11B 0.9600 . ? 
C11 H11C 0.9600 . ? 
C12 H12A 0.9600 . ? 
C12 H12B 0.9600 . ? 
C12 H12C 0.9600 . ? 
O6 C13 1.227(13) . ? 
N2 C13 1.270(14) . ? 
N2 C15 1.404(11) . ? 
N2 C14 1.456(12) . ? 
C13 H13 0.9300 . ? 
C14 H14A 0.9600 . ? 
C14 H14B 0.9600 . ? 
C14 H14C 0.9600 . ? 
C15 H15A 0.9600 . ? 
C15 H15B 0.9600 . ? 
C15 H15C 0.9600 . ? 
N3 O9 1.219(9) . ? 
N3 O8 1.242(9) . ? 
N3 O7 1.269(10) . ? 
 
loop_ 
 _geom_angle_atom_site_label_1 
 _geom_angle_atom_site_label_2 
 _geom_angle_atom_site_label_3 
 _geom_angle 
 _geom_angle_site_symmetry_1 
 _geom_angle_site_symmetry_3 
 _geom_angle_publ_flag 
O1 Eu1 O4 73.77(16) 7_556 4_545 ? 
O1 Eu1 O3 77.95(17) 7_556 6_566 ? 
O4 Eu1 O3 133.87(16) 4_545 6_566 ? 
O1 Eu1 O6 81.7(2) 7_556 . ? 
O4 Eu1 O6 133.1(2) 4_545 . ? 
O3 Eu1 O6 75.8(2) 6_566 . ? 
O1 Eu1 O5 146.0(2) 7_556 . ? 
O4 Eu1 O5 140.1(2) 4_545 . ? 
O3 Eu1 O5 73.6(3) 6_566 . ? 
O6 Eu1 O5 73.7(3) . . ? 
O1 Eu1 O2 124.26(16) 7_556 . ? 
O4 Eu1 O2 77.07(17) 4_545 . ? 
O3 Eu1 O2 90.16(17) 6_566 . ? 
O6 Eu1 O2 147.7(2) . . ? 
O5 Eu1 O2 74.4(2) . . ? 
O1 Eu1 O7 133.0(2) 7_556 . ? 
O4 Eu1 O7 74.0(2) 4_545 . ? 
O3 Eu1 O7 147.5(2) 6_566 . ? 
O6 Eu1 O7 96.5(3) . . ? 
O5 Eu1 O7 73.9(3) . . ? 
O2 Eu1 O7 79.7(2) . . ? 
O1 Eu1 O8 86.3(2) 7_556 . ? 
O4 Eu1 O8 68.91(19) 4_545 . ? 
O3 Eu1 O8 144.30(18) 6_566 . ? 
O6 Eu1 O8 70.3(2) . . ? 
O5 Eu1 O8 106.4(3) . . ? 
O2 Eu1 O8 124.80(18) . . ? 
O7 Eu1 O8 50.3(2) . . ? 
O1 Eu1 O1 76.72(15) 7_556 . ? 
O4 Eu1 O1 70.45(15) 4_545 . ? 
O3 Eu1 O1 68.04(15) 6_566 . ? 
O6 Eu1 O1 140.9(2) . . ? 
O5 Eu1 O1 108.5(2) . . ? 
O2 Eu1 O1 48.86(14) . . ? 
O7 Eu1 O1 122.0(2) . . ? 
O8 Eu1 O1 138.89(18) . . ? 
O1 Eu1 N3 108.8(2) 7_556 . ? 
O4 Eu1 N3 66.93(18) 4_545 . ? 
O3 Eu1 N3 158.56(18) 6_566 . ? 
O6 Eu1 N3 84.9(2) . . ? 
O5 Eu1 N3 92.2(3) . . ? 
O2 Eu1 N3 101.6(2) . . ? 
O7 Eu1 N3 25.5(2) . . ? 
O8 Eu1 N3 25.0(2) . . ? 
O1 Eu1 N3 132.88(17) . . ? 
O1 Eu1 C8 101.20(18) 7_556 . ? 
O4 Eu1 C8 72.48(17) 4_545 . ? 
O3 Eu1 C8 78.30(16) 6_566 . ? 
O6 Eu1 C8 152.7(2) . . ? 
O5 Eu1 C8 90.9(3) . . ? 
O2 Eu1 C8 23.83(16) . . ? 
O7 Eu1 C8 100.7(2) . . ? 
O8 Eu1 C8 136.69(18) . . ? 
O1 Eu1 C8 25.04(15) . . ? 
N3 Eu1 C8 118.76(19) . . ? 
O1 Eu1 C10 136.2(3) 7_556 . ? 
O4 Eu1 C10 141.1(3) 4_545 . ? 
O3 Eu1 C10 58.6(3) 6_566 . ? 
O6 Eu1 C10 82.7(3) . . ? 
O5 Eu1 C10 19.2(3) . . ? 
O2 Eu1 C10 65.3(3) . . ? 
O7 Eu1 C10 89.3(3) . . ? 
O8 Eu1 C10 125.6(3) . . ? 
O1 Eu1 C10 90.8(3) . . ? 
N3 Eu1 C10 110.2(3) . . ? 
C8 Eu1 C10 76.6(3) . . ? 
C8 O1 Eu1 165.2(4) . 7_556 ? 
C8 O1 Eu1 85.0(4) . . ? 
Eu1 O1 Eu1 103.28(15) 7_556 . ? 
C8 O2 Eu1 103.5(4) . . ? 
C9 O3 Eu1 138.8(4) . 6_565 ? 
C9 O4 Eu1 138.3(4) . 4 ? 
C2 C1 C6 120.3(5) . . ? 
C2 C1 C7 121.5(6) . . ? 
C6 C1 C7 118.2(5) . . ? 
C1 C2 C3 119.7(6) . . ? 
C1 C2 H2 120.1 . . ? 
C3 C2 H2 120.1 . . ? 
C4 C3 C2 119.6(5) . . ? 
C4 C3 C8 118.1(5) . . ? 
C2 C3 C8 122.3(5) . . ? 
C5 C4 C3 120.6(5) . . ? 
C5 C4 H4 119.7 . . ? 
C3 C4 H4 119.7 . . ? 
C4 C5 C6 119.9(5) . . ? 
C4 C5 C9 119.7(5) . . ? 
C6 C5 C9 120.3(5) . . ? 
C5 C6 C1 119.7(5) . . ? 
C5 C6 H6 120.1 . . ? 
C1 C6 H6 120.1 . . ? 
C7 C7 C1 177.9(5) 2 . ? 
O2 C8 O1 122.6(6) . . ? 
O2 C8 C3 118.5(5) . . ? 
O1 C8 C3 118.9(6) . . ? 
O2 C8 Eu1 52.7(3) . . ? 
O1 C8 Eu1 69.9(3) . . ? 
C3 C8 Eu1 171.1(4) . . ? 
O3 C9 O4 125.5(6) . . ? 
O3 C9 C5 117.4(6) . . ? 
O4 C9 C5 117.1(6) . . ? 
C10 O5 Eu1 122.2(9) . . ? 
C10 N1 C12 105.9(12) . . ? 
C10 N1 C11 128.0(13) . . ? 
C12 N1 C11 126.1(12) . . ? 
O5 C10 N1 130.2(14) . . ? 
O5 C10 Eu1 38.6(7) . . ? 
N1 C10 Eu1 162.1(10) . . ? 
O5 C10 H10 114.9 . . ? 
N1 C10 H10 114.9 . . ? 
Eu1 C10 H10 78.4 . . ? 
N1 C11 H11A 109.5 . . ? 
N1 C11 H11B 109.5 . . ? 
H11A C11 H11B 109.5 . . ? 
N1 C11 H11C 109.5 . . ? 
H11A C11 H11C 109.5 . . ? 
H11B C11 H11C 109.5 . . ? 
N1 C12 H12A 109.5 . . ? 
N1 C12 H12B 109.5 . . ? 
H12A C12 H12B 109.5 . . ? 
N1 C12 H12C 109.5 . . ? 
H12A C12 H12C 109.5 . . ? 
H12B C12 H12C 109.5 . . ? 
C13 O6 Eu1 134.8(8) . . ? 
C13 N2 C15 125.6(10) . . ? 
C13 N2 C14 114.3(9) . . ? 
C15 N2 C14 118.1(9) . . ? 
O6 C13 N2 131.7(12) . . ? 
O6 C13 H13 114.1 . . ? 
N2 C13 H13 114.1 . . ? 
N2 C14 H14A 109.5 . . ? 
N2 C14 H14B 109.5 . . ? 
H14A C14 H14B 109.5 . . ? 
N2 C14 H14C 109.5 . . ? 
H14A C14 H14C 109.5 . . ? 
H14B C14 H14C 109.5 . . ? 
N2 C15 H15A 109.5 . . ? 
N2 C15 H15B 109.5 . . ? 
H15A C15 H15B 109.5 . . ? 
N2 C15 H15C 109.5 . . ? 
H15A C15 H15C 109.5 . . ? 
H15B C15 H15C 109.5 . . ? 
O9 N3 O8 121.0(9) . . ? 
O9 N3 O7 122.6(9) . . ? 
O8 N3 O7 116.2(6) . . ? 
O9 N3 Eu1 167.4(6) . . ? 
O8 N3 Eu1 59.4(4) . . ? 
O7 N3 Eu1 57.6(4) . . ? 
N3 O7 Eu1 96.9(5) . . ? 
N3 O8 Eu1 95.6(4) . . ? 
 
_diffrn_measured_fraction_theta_max    0.989 
_diffrn_reflns_theta_full              28.37 
_diffrn_measured_fraction_theta_full   0.989 
_refine_diff_density_max    2.895 
_refine_diff_density_min   -1.984 
_refine_diff_density_rms    0.193 

#===END

 
data_2 
 
_audit_creation_method            SHELXL-97 
_chemical_name_systematic 
; 
 ? 
; 
_chemical_name_common             ? 
_chemical_melting_point           'not measured' 
_chemical_formula_moiety          'C32 H41 N7 O18 Tb2' 
_chemical_formula_sum 
 'C32 H41 N7 O18 Tb2' 
_chemical_formula_weight          1129.56 
 
loop_ 
 _atom_type_symbol 
 _atom_type_description 
 _atom_type_scat_dispersion_real 
 _atom_type_scat_dispersion_imag 
 _atom_type_scat_source 
 'C'  'C'   0.0033   0.0016 
 'International Tables Vol C Tables 4.2.6.8 and 6.1.1.4' 
 'H'  'H'   0.0000   0.0000 
 'International Tables Vol C Tables 4.2.6.8 and 6.1.1.4' 
 'N'  'N'   0.0061   0.0033 
 'International Tables Vol C Tables 4.2.6.8 and 6.1.1.4' 
 'O'  'O'   0.0106   0.0060 
 'International Tables Vol C Tables 4.2.6.8 and 6.1.1.4' 
 'Tb'  'Tb'  -0.1723   4.1537 
 'International Tables Vol C Tables 4.2.6.8 and 6.1.1.4' 
 
_symmetry_cell_setting            monoclinic
_symmetry_space_group_name_H-M    c2/c 
 
loop_ 
 _symmetry_equiv_pos_as_xyz 
 'x, y, z' 
 '-x, y, -z+1/2' 
 'x+1/2, y+1/2, z' 
 '-x+1/2, y+1/2, -z+1/2' 
 '-x, -y, -z' 
 'x, -y, z-1/2' 
 '-x+1/2, -y+1/2, -z' 
 'x+1/2, -y+1/2, z-1/2' 
 
_cell_length_a                    22.214(4) 
_cell_length_b                    13.407(3) 
_cell_length_c                    14.781(3) 
_cell_angle_alpha                 90.00 
_cell_angle_beta                  97.20(3) 
_cell_angle_gamma                 90.00 
_cell_volume                      4367.2(15) 
_cell_formula_units_Z             4 
_cell_measurement_temperature     293(2) 
_cell_measurement_reflns_used     ? 
_cell_measurement_theta_min       ? 
_cell_measurement_theta_max       ? 
 
_exptl_crystal_description        block 
_exptl_crystal_colour             colourless 
_exptl_crystal_size_max           0.27 
_exptl_crystal_size_mid           0.24 
_exptl_crystal_size_min           0.22 
_exptl_crystal_density_meas       none 
_exptl_crystal_density_diffrn     1.718 
_exptl_crystal_density_method     'not measured' 
_exptl_crystal_F_000              2224 
_exptl_absorpt_coefficient_mu     3.290 
_exptl_absorpt_correction_type    empirical
_exptl_absorpt_correction_T_min   0.4318
_exptl_absorpt_correction_T_max   0.4902 
_exptl_absorpt_process_details    SADABS 
 
_exptl_special_details 
; 
 ? 
; 
 
_diffrn_ambient_temperature       293(2) 
_diffrn_radiation_wavelength      0.71073 
_diffrn_radiation_type            MoK\a 
_diffrn_radiation_source          'fine-focus sealed tube' 
_diffrn_radiation_monochromator   graphite 
_diffrn_measurement_device_type   'CCD area detector'
_diffrn_measurement_method        'phi and omega scans'
_diffrn_detector_area_resol_mean  '9.00cm'
_diffrn_standards_number          none 
_diffrn_standards_interval_count  none 
_diffrn_standards_interval_time   none 
_diffrn_standards_decay_%         none
_diffrn_reflns_number             13413 
_diffrn_reflns_av_R_equivalents   0.0282 
_diffrn_reflns_av_sigmaI/netI     0.0320 
_diffrn_reflns_limit_h_min        -28 
_diffrn_reflns_limit_h_max        28 
_diffrn_reflns_limit_k_min        -17 
_diffrn_reflns_limit_k_max        16 
_diffrn_reflns_limit_l_min        -14 
_diffrn_reflns_limit_l_max        19 
_diffrn_reflns_theta_min          1.85 
_diffrn_reflns_theta_max          28.51 
_reflns_number_total              5338 
_reflns_number_gt                 4787 
_reflns_threshold_expression      >2sigma(I) 
 
_computing_data_collection        'Bruker SMART' 
_computing_cell_refinement        'Bruker SMART' 
_computing_data_reduction         'Bruker SAINT' 
_computing_structure_solution     'SHELXS-97 (Sheldrick, 1990)' 
_computing_structure_refinement   'SHELXL-97 (Sheldrick, 1997)' 
_computing_molecular_graphics     'SHELXP-97' 
_computing_publication_material   'SHELXTL' 
 
_refine_special_details 
; 
 Refinement of F^2^ against ALL reflections.  The weighted R-factor wR and 
 goodness of fit S are based on F^2^, conventional R-factors R are based 
 on F, with F set to zero for negative F^2^. The threshold expression of 
 F^2^ > 2sigma(F^2^) is used only for calculating R-factors(gt) etc. and is 
 not relevant to the choice of reflections for refinement.  R-factors based 
 on F^2^ are statistically about twice as large as those based on F, and R- 
 factors based on ALL data will be even larger. 
; 
 
_refine_ls_structure_factor_coef  Fsqd  
_refine_ls_matrix_type            full 
_refine_ls_weighting_scheme       calc  
_refine_ls_weighting_details 
 'calc w=1/[\s^2^(Fo^2^)+(0.0754P)^2^+26.2510P] where P=(Fo^2^+2Fc^2^)/3' 
_atom_sites_solution_primary      direct 
_atom_sites_solution_secondary    difmap 
_atom_sites_solution_hydrogens    geom 
_refine_ls_hydrogen_treatment     constr 
_refine_ls_extinction_method      none 
_refine_ls_extinction_coef        ? 
_refine_ls_number_reflns          5338 
_refine_ls_number_parameters      205 
_refine_ls_number_restraints      64 
_refine_ls_R_factor_all           0.0465 
_refine_ls_R_factor_gt            0.0432 
_refine_ls_wR_factor_ref          0.1272 
_refine_ls_wR_factor_gt           0.1245 
_refine_ls_goodness_of_fit_ref    1.096 
_refine_ls_restrained_S_all       1.095 
_refine_ls_shift/su_max           0.002 
_refine_ls_shift/su_mean          0.000 
 
loop_ 
 _atom_site_label 
 _atom_site_type_symbol 
 _atom_site_fract_x 
 _atom_site_fract_y 
 _atom_site_fract_z 
 _atom_site_U_iso_or_equiv 
 _atom_site_adp_type 
 _atom_site_occupancy 
 _atom_site_symmetry_multiplicity 
 _atom_site_calc_flag 
 _atom_site_refinement_flags 
 _atom_site_disorder_assembly 
 _atom_site_disorder_group 
Tb1 Tb 0.330844(8) 0.319076(15) 0.527236(13) 0.02073(10) Uani 1 1 d . . . 
O1 O 0.21218(19) 0.3286(3) 0.4336(3) 0.0335(8) Uani 1 1 d . . . 
O2 O 0.28611(17) 0.4286(3) 0.4104(3) 0.0373(8) Uani 1 1 d . . . 
O3 O 0.26057(15) 0.6249(3) 0.1208(3) 0.0344(8) Uani 1 1 d . . . 
O4 O 0.17689(16) 0.7183(3) 0.1040(2) 0.0323(7) Uani 1 1 d . . . 
C1 C 0.0915(2) 0.5099(4) 0.2575(3) 0.0298(10) Uani 1 1 d . . . 
C2 C 0.1290(2) 0.4508(4) 0.3186(4) 0.0318(10) Uani 1 1 d . . . 
H2 H 0.1119 0.4066 0.3566 0.100 Uiso 1 1 calc . . . 
C3 C 0.1915(2) 0.4576(4) 0.3230(3) 0.0271(9) Uani 1 1 d . . . 
C4 C 0.21687(19) 0.5205(4) 0.2635(3) 0.0270(9) Uani 1 1 d . . . 
H4 H 0.2588 0.5232 0.2648 0.100 Uiso 1 1 calc . . . 
C5 C 0.1806(2) 0.5788(4) 0.2024(3) 0.0270(9) Uani 1 1 d . . . 
C6 C 0.1181(2) 0.5757(4) 0.2007(3) 0.0286(9) Uani 1 1 d . . . 
H6 H 0.0937 0.6176 0.1615 0.100 Uiso 1 1 calc . . . 
C7 C 0.0269(2) 0.5059(4) 0.2533(4) 0.0324(10) Uani 1 1 d . . . 
C8 C 0.2328(2) 0.4008(4) 0.3931(3) 0.0275(9) Uani 1 1 d . . . 
C9 C 0.2079(2) 0.6460(4) 0.1371(3) 0.0267(9) Uani 1 1 d . . . 
O5 O 0.3627(3) 0.4828(6) 0.5767(5) 0.0898(11) Uani 1 1 d U . . 
N1 N 0.3365(4) 0.6346(7) 0.6388(6) 0.0898(11) Uani 1 1 d DU . . 
C10 C 0.3268(5) 0.5526(9) 0.5884(8) 0.0898(11) Uani 1 1 d U . . 
H10 H 0.2879 0.5461 0.5573 0.100 Uiso 1 1 calc . . . 
C11 C 0.2917(5) 0.7066(9) 0.6514(8) 0.0898(11) Uani 1 1 d DU . . 
H11A H 0.3092 0.7579 0.6918 0.100 Uiso 1 1 calc . . . 
H11B H 0.2590 0.6753 0.6774 0.100 Uiso 1 1 calc . . . 
H11C H 0.2765 0.7356 0.5936 0.100 Uiso 1 1 calc . . . 
C12 C 0.3940(5) 0.6299(9) 0.6811(8) 0.0898(11) Uani 1 1 d DU . . 
H12A H 0.4031 0.6895 0.7160 0.100 Uiso 1 1 calc . . . 
H12B H 0.4216 0.6238 0.6363 0.100 Uiso 1 1 calc . . . 
H12C H 0.3982 0.5730 0.7208 0.100 Uiso 1 1 calc . . . 
O6 O 0.3815(3) 0.3003(5) 0.6768(5) 0.0794(10) Uani 1 1 d U . . 
N2 N 0.4116(4) 0.3355(6) 0.8248(6) 0.0794(10) Uani 1 1 d DU . . 
C13 C 0.3789(5) 0.3410(8) 0.7482(7) 0.0794(10) Uani 1 1 d U . . 
H13 H 0.3466 0.3851 0.7475 0.100 Uiso 1 1 calc . . . 
C14 C 0.4511(5) 0.2473(7) 0.8329(7) 0.0794(10) Uani 1 1 d DU . . 
H14A H 0.4693 0.2402 0.8950 0.100 Uiso 1 1 calc . . . 
H14B H 0.4824 0.2551 0.7941 0.100 Uiso 1 1 calc . . . 
H14C H 0.4275 0.1890 0.8149 0.100 Uiso 1 1 calc . . . 
C15 C 0.4021(5) 0.3876(7) 0.9056(7) 0.0794(10) Uani 1 1 d DU . . 
H15A H 0.4284 0.3610 0.9563 0.100 Uiso 1 1 calc . . . 
H15B H 0.3606 0.3798 0.9163 0.100 Uiso 1 1 calc . . . 
H15C H 0.4107 0.4571 0.8986 0.100 Uiso 1 1 calc . . . 
N3 N 0.4471(2) 0.2770(5) 0.4674(4) 0.0520(14) Uani 1 1 d . . . 
O7 O 0.4200(2) 0.3579(4) 0.4514(4) 0.0594(13) Uani 1 1 d . . . 
O8 O 0.4259(2) 0.2192(4) 0.5225(3) 0.0531(11) Uani 1 1 d . . . 
O9 O 0.4912(3) 0.2527(6) 0.4302(5) 0.089(2) Uani 1 1 d . . . 
 
loop_ 
 _atom_site_aniso_label 
 _atom_site_aniso_U_11 
 _atom_site_aniso_U_22 
 _atom_site_aniso_U_33 
 _atom_site_aniso_U_23 
 _atom_site_aniso_U_13 
 _atom_site_aniso_U_12 
Tb1 0.01591(14) 0.02502(14) 0.02059(14) -0.00138(7) -0.00037(9) -0.00012(6) 
O1 0.039(2) 0.0303(18) 0.0314(18) 0.0097(14) 0.0056(16) -0.0002(14) 
O2 0.0273(18) 0.039(2) 0.043(2) 0.0098(16) -0.0080(15) -0.0015(14) 
O3 0.0198(16) 0.044(2) 0.0402(19) 0.0168(16) 0.0051(14) 0.0022(14) 
O4 0.0266(17) 0.0387(19) 0.0315(17) 0.0132(15) 0.0033(14) 0.0039(15) 
C1 0.017(2) 0.035(2) 0.037(2) 0.006(2) 0.0029(18) -0.0012(17) 
C2 0.024(2) 0.033(2) 0.039(3) 0.005(2) 0.0078(19) -0.0024(18) 
C3 0.020(2) 0.031(2) 0.030(2) 0.0062(18) 0.0002(17) 0.0016(17) 
C4 0.0140(19) 0.036(2) 0.031(2) 0.0065(18) 0.0006(16) -0.0004(16) 
C5 0.020(2) 0.032(2) 0.029(2) 0.0081(18) 0.0042(17) 0.0007(17) 
C6 0.019(2) 0.036(2) 0.031(2) 0.0081(19) 0.0016(17) 0.0007(17) 
C7 0.023(2) 0.036(3) 0.039(3) 0.004(2) 0.0051(19) 0.0002(19) 
C8 0.027(2) 0.028(2) 0.027(2) 0.0021(17) 0.0010(17) 0.0044(17) 
C9 0.021(2) 0.033(2) 0.025(2) 0.0056(18) 0.0022(17) -0.0012(18) 
O5 0.0904(12) 0.0894(12) 0.0896(12) -0.0004(4) 0.0115(5) -0.0007(4) 
N1 0.0904(12) 0.0894(12) 0.0896(12) -0.0004(4) 0.0115(5) -0.0007(4) 
C10 0.0904(12) 0.0894(12) 0.0896(12) -0.0004(4) 0.0115(5) -0.0007(4) 
C11 0.0904(12) 0.0894(12) 0.0896(12) -0.0004(4) 0.0115(5) -0.0007(4) 
C12 0.0904(12) 0.0894(12) 0.0896(12) -0.0004(4) 0.0115(5) -0.0007(4) 
O6 0.0797(11) 0.0798(11) 0.0783(11) -0.0009(4) 0.0086(5) 0.0016(4) 
N2 0.0797(11) 0.0798(11) 0.0783(11) -0.0009(4) 0.0086(5) 0.0016(4) 
C13 0.0797(11) 0.0798(11) 0.0783(11) -0.0009(4) 0.0086(5) 0.0016(4) 
C14 0.0797(11) 0.0798(11) 0.0783(11) -0.0009(4) 0.0086(5) 0.0016(4) 
C15 0.0797(11) 0.0798(11) 0.0783(11) -0.0009(4) 0.0086(5) 0.0016(4) 
N3 0.021(2) 0.075(4) 0.061(3) -0.021(3) 0.005(2) -0.004(2) 
O7 0.047(3) 0.050(3) 0.086(4) -0.007(3) 0.027(3) -0.013(2) 
O8 0.034(2) 0.080(3) 0.046(2) 0.012(2) 0.0053(18) 0.020(2) 
O9 0.046(3) 0.128(6) 0.100(5) -0.017(4) 0.041(3) 0.010(3) 
 
_geom_special_details 
; 
 All esds (except the esd in the dihedral angle between two l.s. planes) 
 are estimated using the full covariance matrix.  The cell esds are taken 
 into account individually in the estimation of esds in distances, angles 
 and torsion angles; correlations between esds in cell parameters are only 
 used when they are defined by crystal symmetry.  An approximate (isotropic) 
 treatment of cell esds is used for estimating esds involving l.s. planes. 
; 
 
loop_ 
 _geom_bond_atom_site_label_1 
 _geom_bond_atom_site_label_2 
 _geom_bond_distance 
 _geom_bond_site_symmetry_2 
 _geom_bond_publ_flag 
Tb1 O1 2.304(3) 7_556 ? 
Tb1 O3 2.336(3) 6_566 ? 
Tb1 O4 2.353(3) 4_545 ? 
Tb1 O6 2.365(7) . ? 
Tb1 O2 2.386(4) . ? 
Tb1 O5 2.393(8) . ? 
Tb1 O7 2.452(5) . ? 
Tb1 O8 2.509(4) . ? 
Tb1 O1 2.822(4) . ? 
Tb1 N3 2.888(5) . ? 
Tb1 C8 2.965(5) . ? 
O1 C8 1.255(6) . ? 
O1 Tb1 2.304(3) 7_556 ? 
O2 C8 1.237(6) . ? 
O3 C9 1.255(6) . ? 
O3 Tb1 2.336(3) 6_565 ? 
O4 C9 1.252(6) . ? 
O4 Tb1 2.353(3) 4 ? 
C1 C2 1.397(7) . ? 
C1 C6 1.398(6) . ? 
C1 C7 1.430(6) . ? 
C2 C3 1.385(6) . ? 
C2 H2 0.9300 . ? 
C3 C4 1.388(6) . ? 
C3 C8 1.502(6) . ? 
C4 C5 1.376(6) . ? 
C4 H4 0.9300 . ? 
C5 C6 1.386(6) . ? 
C5 C9 1.503(6) . ? 
C6 H6 0.9300 . ? 
C7 C7 1.187(10) 2 ? 
O5 C10 1.254(13) . ? 
N1 C10 1.330(14) . ? 
N1 C12 1.352(12) . ? 
N1 C11 1.416(12) . ? 
C10 H10 0.9300 . ? 
C11 H11A 0.9600 . ? 
C11 H11B 0.9600 . ? 
C11 H11C 0.9600 . ? 
C12 H12A 0.9600 . ? 
C12 H12B 0.9600 . ? 
C12 H12C 0.9600 . ? 
O6 C13 1.196(12) . ? 
N2 C13 1.269(13) . ? 
N2 C15 1.422(11) . ? 
N2 C14 1.468(11) . ? 
C13 H13 0.9300 . ? 
C14 H14A 0.9600 . ? 
C14 H14B 0.9600 . ? 
C14 H14C 0.9600 . ? 
C15 H15A 0.9600 . ? 
C15 H15B 0.9600 . ? 
C15 H15C 0.9600 . ? 
N3 O9 1.226(7) . ? 
N3 O7 1.248(9) . ? 
N3 O8 1.256(8) . ? 
 
loop_ 
 _geom_angle_atom_site_label_1 
 _geom_angle_atom_site_label_2 
 _geom_angle_atom_site_label_3 
 _geom_angle 
 _geom_angle_site_symmetry_1 
 _geom_angle_site_symmetry_3 
 _geom_angle_publ_flag 
O1 Tb1 O3 78.37(14) 7_556 6_566 ? 
O1 Tb1 O4 73.97(14) 7_556 4_545 ? 
O3 Tb1 O4 133.46(12) 6_566 4_545 ? 
O1 Tb1 O6 80.7(2) 7_556 . ? 
O3 Tb1 O6 75.9(2) 6_566 . ? 
O4 Tb1 O6 133.37(19) 4_545 . ? 
O1 Tb1 O2 124.21(14) 7_556 . ? 
O3 Tb1 O2 88.97(14) 6_566 . ? 
O4 Tb1 O2 77.05(14) 4_545 . ? 
O6 Tb1 O2 148.00(19) . . ? 
O1 Tb1 O5 145.9(2) 7_556 . ? 
O3 Tb1 O5 73.6(2) 6_566 . ? 
O4 Tb1 O5 140.1(2) 4_545 . ? 
O6 Tb1 O5 74.0(2) . . ? 
O2 Tb1 O5 74.8(2) . . ? 
O1 Tb1 O7 132.99(16) 7_556 . ? 
O3 Tb1 O7 147.25(16) 6_566 . ? 
O4 Tb1 O7 74.01(16) 4_545 . ? 
O6 Tb1 O7 97.6(2) . . ? 
O2 Tb1 O7 79.96(17) . . ? 
O5 Tb1 O7 73.7(2) . . ? 
O1 Tb1 O8 85.74(16) 7_556 . ? 
O3 Tb1 O8 144.64(15) 6_566 . ? 
O4 Tb1 O8 69.23(15) 4_545 . ? 
O6 Tb1 O8 70.5(2) . . ? 
O2 Tb1 O8 125.71(15) . . ? 
O5 Tb1 O8 106.3(2) . . ? 
O7 Tb1 O8 50.87(18) . . ? 
O1 Tb1 O1 76.75(13) 7_556 . ? 
O3 Tb1 O1 67.88(12) 6_566 . ? 
O4 Tb1 O1 69.78(12) 4_545 . ? 
O6 Tb1 O1 140.3(2) . . ? 
O2 Tb1 O1 48.59(11) . . ? 
O5 Tb1 O1 109.3(2) . . ? 
O7 Tb1 O1 121.66(16) . . ? 
O8 Tb1 O1 138.44(15) . . ? 
O1 Tb1 N3 108.90(17) 7_556 . ? 
O3 Tb1 N3 159.02(14) 6_566 . ? 
O4 Tb1 N3 67.12(14) 4_545 . ? 
O6 Tb1 N3 85.8(2) . . ? 
O2 Tb1 N3 101.89(17) . . ? 
O5 Tb1 N3 91.8(2) . . ? 
O7 Tb1 N3 25.39(19) . . ? 
O8 Tb1 N3 25.71(18) . . ? 
O1 Tb1 N3 132.43(14) . . ? 
O1 Tb1 C8 101.11(14) 7_556 . ? 
O3 Tb1 C8 77.74(13) 6_566 . ? 
O4 Tb1 C8 71.90(13) 4_545 . ? 
O6 Tb1 C8 152.6(2) . . ? 
O2 Tb1 C8 23.71(13) . . ? 
O5 Tb1 C8 91.7(2) . . ? 
O7 Tb1 C8 100.59(17) . . ? 
O8 Tb1 C8 136.79(14) . . ? 
O1 Tb1 C8 24.88(12) . . ? 
N3 Tb1 C8 118.53(16) . . ? 
C8 O1 Tb1 166.1(4) . 7_556 ? 
C8 O1 Tb1 83.9(3) . . ? 
Tb1 O1 Tb1 103.25(13) 7_556 . ? 
C8 O2 Tb1 105.4(3) . . ? 
C9 O3 Tb1 138.5(3) . 6_565 ? 
C9 O4 Tb1 138.2(3) . 4 ? 
C2 C1 C6 119.0(4) . . ? 
C2 C1 C7 121.4(4) . . ? 
C6 C1 C7 119.6(4) . . ? 
C3 C2 C1 120.4(4) . . ? 
C3 C2 H2 119.8 . . ? 
C1 C2 H2 119.8 . . ? 
C2 C3 C4 119.6(4) . . ? 
C2 C3 C8 121.4(4) . . ? 
C4 C3 C8 119.0(4) . . ? 
C5 C4 C3 120.7(4) . . ? 
C5 C4 H4 119.7 . . ? 
C3 C4 H4 119.7 . . ? 
C4 C5 C6 119.9(4) . . ? 
C4 C5 C9 120.7(4) . . ? 
C6 C5 C9 119.4(4) . . ? 
C5 C6 C1 120.3(4) . . ? 
C5 C6 H6 119.8 . . ? 
C1 C6 H6 119.8 . . ? 
C7 C7 C1 177.0(6) 2 . ? 
O2 C8 O1 122.1(5) . . ? 
O2 C8 C3 118.4(4) . . ? 
O1 C8 C3 119.5(4) . . ? 
O2 C8 Tb1 50.9(2) . . ? 
O1 C8 Tb1 71.2(3) . . ? 
C3 C8 Tb1 169.2(3) . . ? 
O4 C9 O3 125.5(4) . . ? 
O4 C9 C5 117.8(4) . . ? 
O3 C9 C5 116.7(4) . . ? 
C10 O5 Tb1 123.9(7) . . ? 
C10 N1 C12 107.3(9) . . ? 
C10 N1 C11 124.8(10) . . ? 
C12 N1 C11 127.6(10) . . ? 
O5 C10 N1 129.2(11) . . ? 
O5 C10 H10 115.4 . . ? 
N1 C10 H10 115.4 . . ? 
N1 C11 H11A 109.5 . . ? 
N1 C11 H11B 109.5 . . ? 
H11A C11 H11B 109.5 . . ? 
N1 C11 H11C 109.5 . . ? 
H11A C11 H11C 109.5 . . ? 
H11B C11 H11C 109.5 . . ? 
N1 C12 H12A 109.5 . . ? 
N1 C12 H12B 109.5 . . ? 
H12A C12 H12B 109.5 . . ? 
N1 C12 H12C 109.5 . . ? 
H12A C12 H12C 109.5 . . ? 
H12B C12 H12C 109.5 . . ? 
C13 O6 Tb1 134.9(7) . . ? 
C13 N2 C15 126.3(9) . . ? 
C13 N2 C14 112.9(9) . . ? 
C15 N2 C14 118.6(8) . . ? 
O6 C13 N2 132.5(11) . . ? 
O6 C13 H13 113.7 . . ? 
N2 C13 H13 113.7 . . ? 
N2 C14 H14A 109.5 . . ? 
N2 C14 H14B 109.5 . . ? 
H14A C14 H14B 109.5 . . ? 
N2 C14 H14C 109.5 . . ? 
H14A C14 H14C 109.5 . . ? 
H14B C14 H14C 109.5 . . ? 
N2 C15 H15A 109.5 . . ? 
N2 C15 H15B 109.5 . . ? 
H15A C15 H15B 109.5 . . ? 
N2 C15 H15C 109.5 . . ? 
H15A C15 H15C 109.5 . . ? 
H15B C15 H15C 109.5 . . ? 
O9 N3 O7 122.5(7) . . ? 
O9 N3 O8 120.8(7) . . ? 
O7 N3 O8 116.6(5) . . ? 
O9 N3 Tb1 169.9(5) . . ? 
O7 N3 Tb1 57.4(3) . . ? 
O8 N3 Tb1 60.1(3) . . ? 
N3 O7 Tb1 97.2(4) . . ? 
N3 O8 Tb1 94.2(4) . . ? 
 
_diffrn_measured_fraction_theta_max    0.964 
_diffrn_reflns_theta_full              28.51 
_diffrn_measured_fraction_theta_full   0.964 
_refine_diff_density_max    2.800 
_refine_diff_density_min   -2.037 
_refine_diff_density_rms    0.171 

#===END

 
data_3 
 
_audit_creation_method            SHELXL-97 
_chemical_name_systematic 
; 
 ? 
; 
_chemical_name_common             ? 
_chemical_melting_point           'not measured'  
_chemical_formula_moiety          'C32 H41 Er2 N7 O18' 
_chemical_formula_sum 
 'C32 H41 Er2 N7 O18' 
_chemical_formula_weight          1146.24 
 
loop_ 
 _atom_type_symbol 
 _atom_type_description 
 _atom_type_scat_dispersion_real 
 _atom_type_scat_dispersion_imag 
 _atom_type_scat_source 
 'C'  'C'   0.0033   0.0016 
 'International Tables Vol C Tables 4.2.6.8 and 6.1.1.4' 
 'H'  'H'   0.0000   0.0000 
 'International Tables Vol C Tables 4.2.6.8 and 6.1.1.4' 
 'N'  'N'   0.0061   0.0033 
 'International Tables Vol C Tables 4.2.6.8 and 6.1.1.4' 
 'O'  'O'   0.0106   0.0060 
 'International Tables Vol C Tables 4.2.6.8 and 6.1.1.4' 
 'Er'  'Er'  -0.2586   4.9576 
 'International Tables Vol C Tables 4.2.6.8 and 6.1.1.4' 
 
_symmetry_cell_setting            monoclinic
_symmetry_space_group_name_H-M    c2/c 
 
loop_ 
 _symmetry_equiv_pos_as_xyz 
 'x, y, z' 
 '-x, y, -z+1/2' 
 'x+1/2, y+1/2, z' 
 '-x+1/2, y+1/2, -z+1/2' 
 '-x, -y, -z' 
 'x, -y, z-1/2' 
 '-x+1/2, -y+1/2, -z' 
 'x+1/2, -y+1/2, z-1/2' 
 
_cell_length_a                    22.228(4) 
_cell_length_b                    13.257(3) 
_cell_length_c                    14.639(3) 
_cell_angle_alpha                 90.00 
_cell_angle_beta                  97.07(3) 
_cell_angle_gamma                 90.00 
_cell_volume                      4281.3(15) 
_cell_formula_units_Z             4 
_cell_measurement_temperature     293(2) 
_cell_measurement_reflns_used     ? 
_cell_measurement_theta_min       ? 
_cell_measurement_theta_max       ? 
 
_exptl_crystal_description        block 
_exptl_crystal_colour             colourless 
_exptl_crystal_size_max           0.25
_exptl_crystal_size_mid           0.21 
_exptl_crystal_size_min           0.18 
_exptl_crystal_density_meas       none 
_exptl_crystal_density_diffrn     1.778 
_exptl_crystal_density_method     'not measured' 
_exptl_crystal_F_000              2248 
_exptl_absorpt_coefficient_mu     3.972 
_exptl_absorpt_correction_type    empirical 
_exptl_absorpt_correction_T_min   0.3947
_exptl_absorpt_correction_T_max   0.4927 
_exptl_absorpt_process_details    SADABS 
 
_exptl_special_details 
; 
 ? 
; 
 
_diffrn_ambient_temperature       293(2) 
_diffrn_radiation_wavelength      0.71073 
_diffrn_radiation_type            MoK\a 
_diffrn_radiation_source          'fine-focus sealed tube' 
_diffrn_radiation_monochromator   graphite 
_diffrn_measurement_device_type   'CCD area detector'
_diffrn_measurement_method        'phi and omega scans'
_diffrn_detector_area_resol_mean  '9.00cm'
_diffrn_standards_number          none 
_diffrn_standards_interval_count  none 
_diffrn_standards_interval_time   none 
_diffrn_standards_decay_%         none
_diffrn_reflns_number             13140 
_diffrn_reflns_av_R_equivalents   0.0464 
_diffrn_reflns_av_sigmaI/netI     0.0659 
_diffrn_reflns_limit_h_min        -28 
_diffrn_reflns_limit_h_max        24 
_diffrn_reflns_limit_k_min        -17 
_diffrn_reflns_limit_k_max        13 
_diffrn_reflns_limit_l_min        -19 
_diffrn_reflns_limit_l_max        17 
_diffrn_reflns_theta_min          1.85 
_diffrn_reflns_theta_max          28.49 
_reflns_number_total              5268 
_reflns_number_gt                 3642 
_reflns_threshold_expression      >2sigma(I) 
 
_computing_data_collection        'Bruker SMART' 
_computing_cell_refinement        'Bruker SMART' 
_computing_data_reduction         'Bruker SAINT' 
_computing_structure_solution     'SHELXS-97 (Sheldrick, 1990)' 
_computing_structure_refinement   'SHELXL-97 (Sheldrick, 1997)' 
_computing_molecular_graphics     'SHELXP-97' 
_computing_publication_material   'SHELXTL'  
 
_refine_special_details 
; 
 Refinement of F^2^ against ALL reflections.  The weighted R-factor wR and 
 goodness of fit S are based on F^2^, conventional R-factors R are based 
 on F, with F set to zero for negative F^2^. The threshold expression of 
 F^2^ > 2sigma(F^2^) is used only for calculating R-factors(gt) etc. and is 
 not relevant to the choice of reflections for refinement.  R-factors based 
 on F^2^ are statistically about twice as large as those based on F, and R- 
 factors based on ALL data will be even larger. 
; 
 
_refine_ls_structure_factor_coef  Fsqd  
_refine_ls_matrix_type            full 
_refine_ls_weighting_scheme       calc  
_refine_ls_weighting_details 
 'calc w=1/[\s^2^(Fo^2^)+(0.0765P)^2^+0.0000P] where P=(Fo^2^+2Fc^2^)/3' 
_atom_sites_solution_primary      direct 
_atom_sites_solution_secondary    difmap 
_atom_sites_solution_hydrogens    geom 
_refine_ls_hydrogen_treatment     constr 
_refine_ls_extinction_method      none 
_refine_ls_extinction_coef        ? 
_refine_ls_number_reflns          5268 
_refine_ls_number_parameters      205 
_refine_ls_number_restraints      64 
_refine_ls_R_factor_all           0.0715 
_refine_ls_R_factor_gt            0.0482 
_refine_ls_wR_factor_ref          0.1350 
_refine_ls_wR_factor_gt           0.1245 
_refine_ls_goodness_of_fit_ref    0.984 
_refine_ls_restrained_S_all       0.980 
_refine_ls_shift/su_max           0.001 
_refine_ls_shift/su_mean          0.000 
 
loop_ 
 _atom_site_label 
 _atom_site_type_symbol 
 _atom_site_fract_x 
 _atom_site_fract_y 
 _atom_site_fract_z 
 _atom_site_U_iso_or_equiv 
 _atom_site_adp_type 
 _atom_site_occupancy 
 _atom_site_symmetry_multiplicity 
 _atom_site_calc_flag 
 _atom_site_refinement_flags 
 _atom_site_disorder_assembly 
 _atom_site_disorder_group 
Er1 Er 0.330984(12) 0.32070(2) 0.527549(18) 0.02947(12) Uani 1 1 d . . . 
O1 O 0.2090(3) 0.3271(3) 0.4317(3) 0.0441(12) Uani 1 1 d . . . 
O2 O 0.2836(2) 0.4288(4) 0.4138(3) 0.0429(12) Uani 1 1 d . . . 
O3 O 0.2603(2) 0.6241(4) 0.1177(3) 0.0410(11) Uani 1 1 d . . . 
O4 O 0.1780(2) 0.7217(4) 0.1032(3) 0.0399(11) Uani 1 1 d . . . 
C1 C 0.0916(3) 0.5138(5) 0.2582(5) 0.0376(15) Uani 1 1 d . . . 
C2 C 0.1279(3) 0.4550(6) 0.3197(5) 0.0405(16) Uani 1 1 d . . . 
H2 H 0.1103 0.4120 0.3591 0.100 Uiso 1 1 calc . . . 
C3 C 0.1904(3) 0.4594(5) 0.3235(4) 0.0331(14) Uani 1 1 d . . . 
C4 C 0.2157(3) 0.5224(5) 0.2630(5) 0.0353(15) Uani 1 1 d . . . 
H4 H 0.2576 0.5253 0.2646 0.100 Uiso 1 1 calc . . . 
C5 C 0.1800(3) 0.5802(5) 0.2013(4) 0.0326(14) Uani 1 1 d . . . 
C6 C 0.1177(3) 0.5789(5) 0.1986(5) 0.0389(16) Uani 1 1 d . . . 
H6 H 0.0936 0.6204 0.1581 0.100 Uiso 1 1 calc . . . 
C7 C 0.0276(3) 0.5121(5) 0.2537(5) 0.0417(17) Uani 1 1 d . . . 
C8 C 0.2299(3) 0.3993(5) 0.3932(4) 0.0362(15) Uani 1 1 d . . . 
C9 C 0.2088(3) 0.6483(5) 0.1354(5) 0.0337(14) Uani 1 1 d . . . 
O5 O 0.3613(4) 0.4831(7) 0.5754(6) 0.1032(15) Uani 1 1 d U . . 
N1 N 0.3338(5) 0.6363(9) 0.6333(7) 0.1032(15) Uani 1 1 d DU . . 
C10 C 0.3237(7) 0.5536(11) 0.5842(9) 0.1032(15) Uani 1 1 d U . . 
H10 H 0.2850 0.5460 0.5525 0.100 Uiso 1 1 calc . . . 
C11 C 0.2873(6) 0.7085(10) 0.6414(10) 0.1032(15) Uani 1 1 d DU . . 
H11A H 0.3014 0.7574 0.6875 0.100 Uiso 1 1 calc . . . 
H11B H 0.2521 0.6749 0.6588 0.100 Uiso 1 1 calc . . . 
H11C H 0.2769 0.7419 0.5834 0.100 Uiso 1 1 calc . . . 
C12 C 0.3906(6) 0.6456(11) 0.6842(9) 0.1032(15) Uani 1 1 d DU . . 
H12A H 0.3929 0.7087 0.7166 0.100 Uiso 1 1 calc . . . 
H12B H 0.4213 0.6433 0.6436 0.100 Uiso 1 1 calc . . . 
H12C H 0.3967 0.5912 0.7276 0.100 Uiso 1 1 calc . . . 
O6 O 0.3810(5) 0.3035(7) 0.6750(7) 0.1080(17) Uani 1 1 d U . . 
N2 N 0.4128(6) 0.3339(8) 0.8264(8) 0.1080(17) Uani 1 1 d DU . . 
C13 C 0.3787(7) 0.3413(11) 0.7462(11) 0.1080(17) Uani 1 1 d U . . 
H13 H 0.3463 0.3856 0.7468 0.100 Uiso 1 1 calc . . . 
C14 C 0.4471(7) 0.2417(10) 0.8302(9) 0.1080(17) Uani 1 1 d DU . . 
H14A H 0.4696 0.2345 0.8901 0.100 Uiso 1 1 calc . . . 
H14B H 0.4747 0.2435 0.7846 0.100 Uiso 1 1 calc . . . 
H14C H 0.4200 0.1856 0.8183 0.100 Uiso 1 1 calc . . . 
C15 C 0.4115(7) 0.3888(11) 0.9093(9) 0.1080(17) Uani 1 1 d DU . . 
H15A H 0.4329 0.3520 0.9596 0.100 Uiso 1 1 calc . . . 
H15B H 0.3701 0.3984 0.9203 0.100 Uiso 1 1 calc . . . 
H15C H 0.4304 0.4533 0.9041 0.100 Uiso 1 1 calc . . . 
N3 N 0.4461(3) 0.2820(8) 0.4668(6) 0.071(2) Uani 1 1 d . . . 
O7 O 0.4170(3) 0.3631(5) 0.4511(5) 0.0736(19) Uani 1 1 d . . . 
O8 O 0.4249(3) 0.2229(6) 0.5213(5) 0.0717(18) Uani 1 1 d . . . 
O9 O 0.4885(3) 0.2570(8) 0.4272(6) 0.110(3) Uani 1 1 d . . . 
 
loop_ 
 _atom_site_aniso_label 
 _atom_site_aniso_U_11 
 _atom_site_aniso_U_22 
 _atom_site_aniso_U_33 
 _atom_site_aniso_U_23 
 _atom_site_aniso_U_13 
 _atom_site_aniso_U_12 
Er1 0.02399(16) 0.03541(19) 0.02853(17) -0.00156(13) 0.00136(11) 0.00034(12) 
O1 0.055(3) 0.037(3) 0.042(3) 0.011(2) 0.013(2) 0.004(2) 
O2 0.035(3) 0.045(3) 0.046(3) 0.006(2) -0.005(2) 0.003(2) 
O3 0.026(2) 0.050(3) 0.048(3) 0.011(2) 0.009(2) 0.002(2) 
O4 0.036(3) 0.043(3) 0.042(3) 0.016(2) 0.009(2) 0.006(2) 
C1 0.025(3) 0.041(4) 0.047(4) 0.007(3) 0.004(3) -0.006(3) 
C2 0.028(3) 0.050(4) 0.044(4) 0.013(3) 0.011(3) 0.006(3) 
C3 0.027(3) 0.036(3) 0.035(3) 0.007(3) -0.001(3) 0.003(3) 
C4 0.019(3) 0.047(4) 0.040(4) 0.009(3) 0.007(3) 0.003(3) 
C5 0.023(3) 0.039(4) 0.037(3) 0.006(3) 0.005(3) 0.001(3) 
C6 0.028(3) 0.048(4) 0.042(4) 0.010(3) 0.007(3) 0.003(3) 
C7 0.027(3) 0.048(4) 0.051(4) 0.005(3) 0.012(3) -0.001(3) 
C8 0.038(4) 0.040(4) 0.031(3) 0.001(3) 0.006(3) 0.011(3) 
C9 0.025(3) 0.040(4) 0.035(4) 0.004(3) 0.000(3) -0.004(3) 
O5 0.1034(16) 0.1031(16) 0.1032(16) -0.0002(4) 0.0127(5) -0.0004(4) 
N1 0.1034(16) 0.1031(16) 0.1032(16) -0.0002(4) 0.0127(5) -0.0004(4) 
C10 0.1034(16) 0.1031(16) 0.1032(16) -0.0002(4) 0.0127(5) -0.0004(4) 
C11 0.1034(16) 0.1031(16) 0.1032(16) -0.0002(4) 0.0127(5) -0.0004(4) 
C12 0.1034(16) 0.1031(16) 0.1032(16) -0.0002(4) 0.0127(5) -0.0004(4) 
O6 0.1081(17) 0.1082(17) 0.1075(17) -0.0006(4) 0.0127(5) 0.0009(4) 
N2 0.1081(17) 0.1082(17) 0.1075(17) -0.0006(4) 0.0127(5) 0.0009(4) 
C13 0.1081(17) 0.1082(17) 0.1075(17) -0.0006(4) 0.0127(5) 0.0009(4) 
C14 0.1081(17) 0.1082(17) 0.1075(17) -0.0006(4) 0.0127(5) 0.0009(4) 
C15 0.1081(17) 0.1082(17) 0.1075(17) -0.0006(4) 0.0127(5) 0.0009(4) 
N3 0.033(4) 0.103(7) 0.077(6) -0.020(5) 0.010(4) -0.009(4) 
O7 0.055(4) 0.066(4) 0.106(5) -0.013(4) 0.035(4) -0.018(3) 
O8 0.043(3) 0.104(5) 0.070(4) 0.015(4) 0.012(3) 0.029(4) 
O9 0.057(5) 0.152(9) 0.129(7) -0.027(6) 0.049(5) 0.009(5) 
 
_geom_special_details 
; 
 All esds (except the esd in the dihedral angle between two l.s. planes) 
 are estimated using the full covariance matrix.  The cell esds are taken 
 into account individually in the estimation of esds in distances, angles 
 and torsion angles; correlations between esds in cell parameters are only 
 used when they are defined by crystal symmetry.  An approximate (isotropic) 
 treatment of cell esds is used for estimating esds involving l.s. planes. 
; 
 
loop_ 
 _geom_bond_atom_site_label_1 
 _geom_bond_atom_site_label_2 
 _geom_bond_distance 
 _geom_bond_site_symmetry_2 
 _geom_bond_publ_flag 
Er1 O1 2.261(5) 7_556 ? 
Er1 O3 2.293(4) 6_566 ? 
Er1 O4 2.309(4) 4_545 ? 
Er1 O6 2.315(10) . ? 
Er1 O5 2.337(9) . ? 
Er1 O2 2.346(5) . ? 
Er1 O7 2.398(6) . ? 
Er1 O8 2.468(6) . ? 
Er1 N3 2.857(8) . ? 
Er1 C8 2.985(7) . ? 
O1 C8 1.231(8) . ? 
O1 Er1 2.261(5) 7_556 ? 
O2 C8 1.256(8) . ? 
O3 C9 1.248(8) . ? 
O3 Er1 2.293(4) 6_565 ? 
O4 C9 1.248(8) . ? 
O4 Er1 2.309(4) 4 ? 
C1 C2 1.374(9) . ? 
C1 C6 1.403(9) . ? 
C1 C7 1.418(9) . ? 
C2 C3 1.385(9) . ? 
C2 H2 0.9300 . ? 
C3 C4 1.386(9) . ? 
C3 C8 1.493(9) . ? 
C4 C5 1.362(9) . ? 
C4 H4 0.9300 . ? 
C5 C6 1.380(9) . ? 
C5 C9 1.518(9) . ? 
C6 H6 0.9300 . ? 
C7 C7 1.217(13) 2 ? 
O5 C10 1.271(15) . ? 
N1 C10 1.315(15) . ? 
N1 C12 1.389(13) . ? 
N1 C11 1.426(13) . ? 
C10 H10 0.9300 . ? 
C11 H11A 0.9600 . ? 
C11 H11B 0.9600 . ? 
C11 H11C 0.9600 . ? 
C12 H12A 0.9600 . ? 
C12 H12B 0.9600 . ? 
C12 H12C 0.9600 . ? 
O6 C13 1.163(15) . ? 
N2 C13 1.321(18) . ? 
N2 C15 1.419(13) . ? 
N2 C14 1.437(13) . ? 
C13 H13 0.9300 . ? 
C14 H14A 0.9600 . ? 
C14 H14B 0.9600 . ? 
C14 H14C 0.9600 . ? 
C15 H15A 0.9600 . ? 
C15 H15B 0.9600 . ? 
C15 H15C 0.9600 . ? 
N3 O9 1.212(10) . ? 
N3 O8 1.251(10) . ? 
N3 O7 1.262(11) . ? 
 
loop_ 
 _geom_angle_atom_site_label_1 
 _geom_angle_atom_site_label_2 
 _geom_angle_atom_site_label_3 
 _geom_angle 
 _geom_angle_site_symmetry_1 
 _geom_angle_site_symmetry_3 
 _geom_angle_publ_flag 
O1 Er1 O3 78.77(18) 7_556 6_566 ? 
O1 Er1 O4 74.34(18) 7_556 4_545 ? 
O3 Er1 O4 131.57(17) 6_566 4_545 ? 
O1 Er1 O6 80.1(3) 7_556 . ? 
O3 Er1 O6 77.2(3) 6_566 . ? 
O4 Er1 O6 134.4(3) 4_545 . ? 
O1 Er1 O5 145.8(2) 7_556 . ? 
O3 Er1 O5 74.1(2) 6_566 . ? 
O4 Er1 O5 139.8(2) 4_545 . ? 
O6 Er1 O5 73.9(3) . . ? 
O1 Er1 O2 124.03(19) 7_556 . ? 
O3 Er1 O2 86.21(18) 6_566 . ? 
O4 Er1 O2 76.90(18) 4_545 . ? 
O6 Er1 O2 147.6(3) . . ? 
O5 Er1 O2 74.8(2) . . ? 
O1 Er1 O7 133.5(2) 7_556 . ? 
O3 Er1 O7 146.7(2) 6_566 . ? 
O4 Er1 O7 74.8(2) 4_545 . ? 
O6 Er1 O7 98.0(3) . . ? 
O5 Er1 O7 73.0(3) . . ? 
O2 Er1 O7 80.8(2) . . ? 
O1 Er1 O8 85.2(2) 7_556 . ? 
O3 Er1 O8 146.3(2) 6_566 . ? 
O4 Er1 O8 70.0(2) 4_545 . ? 
O6 Er1 O8 70.8(3) . . ? 
O5 Er1 O8 106.3(3) . . ? 
O2 Er1 O8 127.0(2) . . ? 
O7 Er1 O8 51.7(3) . . ? 
O1 Er1 N3 108.8(3) 7_556 . ? 
O3 Er1 N3 160.0(2) 6_566 . ? 
O4 Er1 N3 68.2(2) 4_545 . ? 
O6 Er1 N3 85.8(3) . . ? 
O5 Er1 N3 91.3(3) . . ? 
O2 Er1 N3 103.3(2) . . ? 
O7 Er1 N3 26.0(3) . . ? 
O8 Er1 N3 25.9(2) . . ? 
O1 Er1 C8 100.8(2) 7_556 . ? 
O3 Er1 C8 75.78(17) 6_566 . ? 
O4 Er1 C8 70.81(18) 4_545 . ? 
O6 Er1 C8 152.2(3) . . ? 
O5 Er1 C8 92.4(3) . . ? 
O2 Er1 C8 23.58(18) . . ? 
O7 Er1 C8 100.9(2) . . ? 
O8 Er1 C8 136.89(19) . . ? 
N3 Er1 C8 119.2(2) . . ? 
C8 O1 Er1 167.9(5) . 7_556 ? 
C8 O2 Er1 108.1(4) . . ? 
C9 O3 Er1 138.5(5) . 6_565 ? 
C9 O4 Er1 138.0(4) . 4 ? 
C2 C1 C6 120.2(6) . . ? 
C2 C1 C7 121.8(6) . . ? 
C6 C1 C7 118.1(6) . . ? 
C1 C2 C3 120.5(6) . . ? 
C1 C2 H2 119.8 . . ? 
C3 C2 H2 119.8 . . ? 
C2 C3 C4 118.9(6) . . ? 
C2 C3 C8 120.6(6) . . ? 
C4 C3 C8 120.5(6) . . ? 
C5 C4 C3 120.9(6) . . ? 
C5 C4 H4 119.5 . . ? 
C3 C4 H4 119.5 . . ? 
C4 C5 C6 120.8(6) . . ? 
C4 C5 C9 120.0(6) . . ? 
C6 C5 C9 119.2(6) . . ? 
C5 C6 C1 118.7(6) . . ? 
C5 C6 H6 120.7 . . ? 
C1 C6 H6 120.7 . . ? 
C7 C7 C1 177.5(10) 2 . ? 
O1 C8 O2 122.2(6) . . ? 
O1 C8 C3 120.3(6) . . ? 
O2 C8 C3 117.4(6) . . ? 
O1 C8 Er1 73.9(4) . . ? 
O2 C8 Er1 48.3(3) . . ? 
C3 C8 Er1 165.7(5) . . ? 
O3 C9 O4 126.7(6) . . ? 
O3 C9 C5 116.6(6) . . ? 
O4 C9 C5 116.7(6) . . ? 
C10 O5 Er1 122.6(9) . . ? 
C10 N1 C12 116.8(12) . . ? 
C10 N1 C11 121.8(12) . . ? 
C12 N1 C11 121.1(12) . . ? 
O5 C10 N1 126.7(13) . . ? 
O5 C10 H10 116.7 . . ? 
N1 C10 H10 116.7 . . ? 
N1 C11 H11A 109.5 . . ? 
N1 C11 H11B 109.5 . . ? 
H11A C11 H11B 109.5 . . ? 
N1 C11 H11C 109.5 . . ? 
H11A C11 H11C 109.5 . . ? 
H11B C11 H11C 109.5 . . ? 
N1 C12 H12A 109.5 . . ? 
N1 C12 H12B 109.5 . . ? 
H12A C12 H12B 109.5 . . ? 
N1 C12 H12C 109.5 . . ? 
H12A C12 H12C 109.5 . . ? 
H12B C12 H12C 109.5 . . ? 
C13 O6 Er1 136.4(11) . . ? 
C13 N2 C15 130.6(13) . . ? 
C13 N2 C14 109.9(12) . . ? 
C15 N2 C14 118.1(12) . . ? 
O6 C13 N2 132.9(15) . . ? 
O6 C13 H13 113.6 . . ? 
N2 C13 H13 113.6 . . ? 
N2 C14 H14A 109.5 . . ? 
N2 C14 H14B 109.5 . . ? 
H14A C14 H14B 109.5 . . ? 
N2 C14 H14C 109.5 . . ? 
H14A C14 H14C 109.5 . . ? 
H14B C14 H14C 109.5 . . ? 
N2 C15 H15A 109.5 . . ? 
N2 C15 H15B 109.5 . . ? 
H15A C15 H15B 109.5 . . ? 
N2 C15 H15C 109.5 . . ? 
H15A C15 H15C 109.5 . . ? 
H15B C15 H15C 109.5 . . ? 
O9 N3 O8 120.7(11) . . ? 
O9 N3 O7 123.9(10) . . ? 
O8 N3 O7 115.1(7) . . ? 
O9 N3 Er1 167.7(7) . . ? 
O8 N3 Er1 59.4(4) . . ? 
O7 N3 Er1 56.2(4) . . ? 
N3 O7 Er1 97.8(5) . . ? 
N3 O8 Er1 94.7(5) . . ? 
 
_diffrn_measured_fraction_theta_max    0.968 
_diffrn_reflns_theta_full              28.49 
_diffrn_measured_fraction_theta_full   0.968 
_refine_diff_density_max    2.442 
_refine_diff_density_min   -1.500 
_refine_diff_density_rms    0.176 

#===END
